# Supplementary material for: TORCH Congenital Syndrome Infections in Central America’s Northern Triangle
Source: MDPI journal article supplement (doi:10.3390/microorganisms11020257), 2023-01-19
Supplement: s1 [file s1]

| Pathogen                                       | Location                                                     | Population                                                                                                                | Test Performed                                                                                   | Results                                                                                                                                                                                                                                                                        | Article/Data Type [Reference]                                        |
|------------------------------------------------|--------------------------------------------------------------|---------------------------------------------------------------------------------------------------------------------------|--------------------------------------------------------------------------------------------------|--------------------------------------------------------------------------------------------------------------------------------------------------------------------------------------------------------------------------------------------------------------------------------|----------------------------------------------------------------------|
| <i>T. gondii</i>                               | n/a                                                          | Pregnant women at global, WHO region, country level                                                                       | Secondary data analysis of serology studies, Bayesian modelling                                  | Country level seroprevalence:<br>- Guatemala<br>IgM 0.9% (range: 0.8%-1.0%)<br>IgG 52.8% (range: 52.5%-53.2%)<br>- Honduras<br>IgM 1.0% (range: 1.0%-1.1%)<br>IgG 29.7% (range: 29.4%-30.0%)<br>- El Salvador<br>IgM 0.9% (range: 0.8%-1.0%)<br>IgG 52.1% (range: 51.7%-52.4%) | Systematic review, meta-analysis, modelling analysis [31]            |
| <i>T. gondii</i>                               | San Juan Sacatepéquez, Guatemala                             | 60 women presenting to "Santa Bárbara" clinic                                                                             | IgM CLIA                                                                                         | 0% (0/60) IgM positivity of women had positive IgM result                                                                                                                                                                                                                      | Cross-sectional analysis, Veterinary medicine thesis [36]            |
| <i>T. gondii</i>                               | Zacapa department, Guatemala                                 | 236 woman, ages 15-45 years who previously attended an information session                                                | IgG ELISA                                                                                        | 50.4% (119/236) positive                                                                                                                                                                                                                                                       | Cross-sectional analysis, Biochemistry thesis [37]                   |
| <i>T. gondii</i>                               | Zacapa and Sacatepéquez departments, Guatemala               | 523 neonates from departmental referent hospitals Antigua Guatemala, Amatitlán y Zacapa                                   | IgM and IgG ELISA                                                                                | 0.2% (1/523) IgM positive neonates<br>-positive neonate resulted from Hospital Nacional de Amatitlán confirmed with positive IgM in the mother                                                                                                                                 | Cross-sectional analysis, Biochemistry thesis [38]                   |
| <i>T. gondii</i>                               | Paraíso city, Honduras                                       | 88 pregnant women presenting to prenatal care unit                                                                        | IgM and IgG ELISA                                                                                | 48% (42/88) of women IgM positive<br>49% (43/88) of women IgG positive                                                                                                                                                                                                         | Cross-sectional analysis, Epidemiology thesis [39]                   |
| <i>T. gondii</i>                               | Concepción municipality, Usulután, El Salvador               | 98 women, ages 15-45 years presenting for external consult in a public health clinic                                      | IgM and IgG combination immunochromatographic lateral flow test                                  | 0% (0/98) of women IgM positive<br>26.5% (26/98) of women IgG positive                                                                                                                                                                                                         | Cross-sectional analysis, Clinical Laboratory Specialist thesis [39] |
| <i>T. gondii</i>                               | San Miguel, El Salvador                                      | 86 adult female blood donors care in a departmental referent public hospital                                              | IgM and IgG ELISA                                                                                | 0% (0/86) of women IgM positive<br>17% (15/86) of women IgG positive                                                                                                                                                                                                           | Cross-sectional analysis, Clinical Laboratory Specialist thesis [41] |
| <i>T. gondii</i> ,<br><i>CMV</i> , <i>ZIKV</i> | San Salvador, El Salvador                                    | Infants ages <1 year with microcephaly attending neurological consult at the national children's hospital                 | Clinical chart abstraction                                                                       | 7.3% (3/41) infants positive for <i>T. gondii</i><br>7.3% (3/41) infants positive for <i>T. gondii</i> and CMV<br>12.2% (5/41) infants positive for CMV<br>7.3% (3/41) infants positive for ZIKV                                                                               | Cross-sectional analysis, Pediatric Medicine thesis [42]             |
| <i>T. cruzi</i>                                | Central America                                              | Country level                                                                                                             | Data derived from literature, Institutes/Ministries of Health, public health official interviews | Country level seroprevalence:<br>- Guatemala: 1.2%<br>- Honduras: 0.9%<br>- El Salvador: 1.3%                                                                                                                                                                                  | Review [57]                                                          |
| <i>T. cruzi</i>                                | Güisiltepeque y Los Riscos municipalities, Jalapa, Guatemala | 150 women ages 15-49 years                                                                                                | IgG ELISA                                                                                        | 3.3% (5/150) IgG positive<br>-2/5 pregnant women included in the study were IgG positive                                                                                                                                                                                       | Cross-sectional analysis, Biochemistry thesis [58]                   |
| <i>T. cruzi</i>                                | Comapa municipality, Jutiapa, Guatemala                      | 390 women of childbearing age                                                                                             | IgG ELISA                                                                                        | 10.8% (42/390) IgG positive                                                                                                                                                                                                                                                    | Cross-sectional analysis [59]                                        |
| <i>T. cruzi</i>                                | Las Palmas town, Olopa, Chiquimula, Guatemala                | 134 women ages 15-49 years                                                                                                | IgG IHA, ELISA, immunochromatographic lateral flow test and microscopy                           | 27.6% (37/134) IgG positive                                                                                                                                                                                                                                                    | Cross-sectional analysis, Biochemistry thesis [60]                   |
| <i>T. cruzi</i>                                | 12 departments Honduras                                      | 2794 pregnant women and girls ages 13-39                                                                                  | IgG ELISA                                                                                        | 1.6% (46/2794) IgG positive                                                                                                                                                                                                                                                    | Cross-sectional analysis, Epidemiology thesis [61]                   |
| <i>T. cruzi</i>                                | Argentina, Mexico and Honduras                               | 6853 women presenting for delivery in two hospitals and respective neonates from La Esperanza and Santa Bárbara, Honduras | immunochromatographic lateral flow, IgG ELISA and PCR on maternal blood                          | -Honduras:<br>2.8% (183/6,583) cord blood samples positive by rapid test<br><br>78.7% (181/230) IgG ELISA positive mothers                                                                                                                                                     | Cross-sectional analysis [56]                                        |

|                 |                                                        |                                                                                                          |                                                       |                                                                                                                                                                                                                                                                                                          |                                                                      |
|-----------------|--------------------------------------------------------|----------------------------------------------------------------------------------------------------------|-------------------------------------------------------|----------------------------------------------------------------------------------------------------------------------------------------------------------------------------------------------------------------------------------------------------------------------------------------------------------|----------------------------------------------------------------------|
|                 |                                                        | (28145 total women recruited from all country study sites)                                               |                                                       | 72.9% (132/181) PCR positive mothers<br><br>0/182 congenital transmission cases                                                                                                                                                                                                                          |                                                                      |
| <i>T. cruzi</i> | Honduras                                               | Clinical suspicion of neonate based on maternal history and neonatal exam                                | Direct parasitological examination                    | -Asymptomatic at the time of birth with remarkable cardiac results on echocardiogram<br>-Infant treated with Nifurtimox and had negative blood smear at 6 months post treatment                                                                                                                          | Case Report [62]                                                     |
| <i>T. cruzi</i> | Ahuachapán & Sonsonate departments, El Salvador        | 943 pregnant women recruited from health centers from 4 selected high-risk municipalities                | IgG ELISA, IHA                                        | 3.8% (36/943) IgG positive mothers<br><br>1 of 32 infants screened between 9-16 months positive from Guymango                                                                                                                                                                                            | Cross-sectional analysis [54]                                        |
| <i>T. cruzi</i> | San Miguel, Morazán, La Unión departments, El Salvador | 116 pregnant women and girls 10-49 years presenting for prenatal care at health centers from three towns | Strout, IgG ELISA                                     | 8.6% (10/116) participants ELISA & Strout positive<br><br>-10% (1/10) positive participants reported history of Romaña sign                                                                                                                                                                              | Cross-sectional analysis, Medical degree thesis [63]                 |
| <i>T. cruzi</i> | La Unión, El Salvador                                  | 145 third trimester pregnant women and girls ages 13-41 and resulting neonates                           | Immunochromatographic lateral flow, IgG ELISA, Strout | 1.9% (1/52) positive by ELISA and rapid test<br><br>-resulting neonate from the positive mother was negative by Strout                                                                                                                                                                                   | Cross-sectional analysis, Clinical Laboratory Specialist thesis [64] |
| ZIKV            | WHO Region of the Americas                             | Reported cases at the country level 2015-2018                                                            | n/a                                                   | - Guatemala<br>3,907 reported autochthonous cases<br>1,302 confirmed cases<br>140 congenital cases<br>- Honduras<br>32,385 reported autochthonous cases<br>308 confirmed cases<br>8 congenital cases<br>- El Salvador<br>11,789 reported autochthonous cases<br>51 confirmed cases<br>4 congenital cases | PAHO data [75]                                                       |
| CMV             | n/a                                                    | General population, blood and organ donors, and women of childbearing age at WHO region, country level   | Secondary data analysis of serology studies           | - El Salvador<br>87% (95%UI: 67-97)                                                                                                                                                                                                                                                                      | Systematic Review, meta-analysis [95]                                |

CLIA- chemiluminescent immunoassay, ELISA- enzyme-linked immunosorbent assay; IHA- Indirect hemagglutination CMV/ cytomegalovirus, ZIKV/ zika virus, UI- uncertainty interval, PAHO/-Pan American Health Organization, WHO- World Health Organization. Professional degree theses have not been peer-reviewed.
